# Supplementary material for: A novel crosslinker for synthesizing hypercrosslinked ionic polymers containing activating groups as efficient catalysts for the CO2 cycloaddition reaction
Source: Royal Society of Chemistry journal article supplement (doi:10.1039/d2se00143h), 2022-01-01
Supplement: d2se00143h1.pdf [file d2se00143h1.pdf]

## Supplementary Materials

For

### Novel crosslinker for synthesizing hypercrosslinked ionic polymers containing activating groups as efficient catalysts for CO<sub>2</sub> cycloaddition reaction

Xu Liao<sup>a</sup>, Xiaoyan Xiang<sup>a</sup>, Zeyu Wang<sup>a</sup>, Ruixun Ma<sup>b</sup>, Lingzheng Kong<sup>b</sup>, Xilin Gao<sup>a</sup>, Jiao He<sup>a</sup>, Wenjuan Hou<sup>c</sup>, Cheng Peng<sup>a,\*</sup>, Jinqing Lin<sup>a,\*</sup>

<sup>a</sup> College of Materials Science and Engineering, Huaqiao University, Xiamen 361021, China

<sup>b</sup> College of Chemical Engineering, Huaqiao University, Xiamen 361021, China

<sup>c</sup> Instrumental Analysis Center, Huaqiao University, Xiamen 361021, China

E-mail: chengpeng@hqu.edu.cn (Cheng Peng); linlab@hqu.edu.cn (Jingqin Lin).

### Supplementary Experimental

#### 1.1 Materials

The commercial chemicals and reagents were used as received without further purification unless otherwise stated. 4,4'-bis(chloromethyl)-1,1'-biphenyl (BCB, 96%), 4,4'-bis(bromomethyl)biphenyl (BBB, 97%), bromoacetaldehyde dimethyl acetal (BDC, 97%), 1,2-dichloroethane (DCE, AR), 2,2-chloro-1,1-dimethoxyethane (CDA, 98%), dimethoxymethane (FDA, 98%), anhydrous ferric chloride (FeCl<sub>3</sub>, AR), 1-methyl-1H-imidazole-2-carboxylic acid (90%), epichlorohydrin (AR), allyl glycidyl ether (99%), butyl glycidyl ether (98%) were provided by Aladdin Chemical Reagent Co. LTD. 1H-imidazole-2-methanol (98%), 1,2-dimethylimidazole (98%), styrene oxide (98%), glycidyl phenyl ether (99%), epibromohydrin (98%), dibromomethane (98%) were purchased from Energy Chemical Reagent Co.LTD. O-tolyl glycidyl were provided by Macklin Chemical Reagent Co. LTD.

#### 1.2 Characterization

The IR spectra were characterized by using an FT-IR (3500~500 cm<sup>-1</sup>) spectrometer at 4 cm<sup>-1</sup> resolution and 32 scans (Nicolet Nexus FT-IR spectrometer, USA). NMR spectra were obtained in CDCl<sub>3</sub> on a Bruker AVANCE III 500MHz spectrometer for <sup>1</sup>H NMR, the particular NMR spectra can be found in the supplementary information. <sup>13</sup>C CP/MAS NMR spectra were measured on an Agilent-NMR-vnmrs 600. Thermogravimetric analysis of the samples were heated from 50 °C to 800 °C at ramp 10 °C/min Under Ar (TGA-50H, Shimadzu). Brunauer-Emmett-Teller (BET) pore volumes and surface areas were calculated at 77 K by using JWGB (JW-DEL 200), CO<sub>2</sub> sorption isotherms were recorded at 273 K and 298 K. The crystal structure of the samples were examined by X-ray diffraction (XRD) on SmartLa. CHNS elemental analysis were performed on Vario EL Cube.

Field emission scanning electron microscope (FESEM; Hitachi S-4800, accelerated voltage: 5 kV) was used to observe the morphology. Transmission electron microscope (TEM) images of the samples were obtained by Hitachi H-7650. X-ray photoelectron spectroscopy (XPS) of the HIP(3)-OH was determined by Thermo Fisher Scientific K-alpha<sup>+</sup> equipped with Al K radiation (1486.68 eV).

### 1.3 Synthesis of polymers

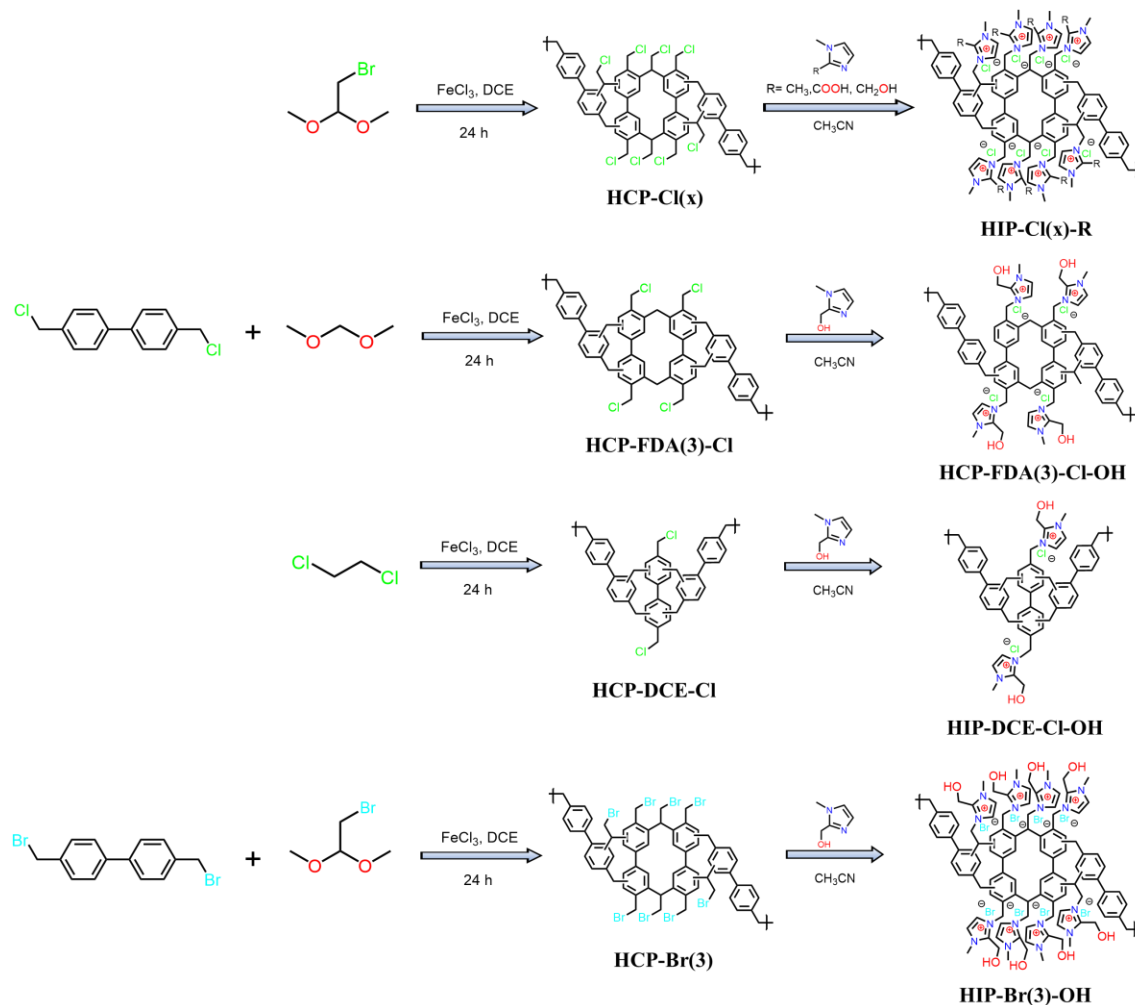

**Scheme S1.** Synthesis of HIPs.

## Supplementary Figures

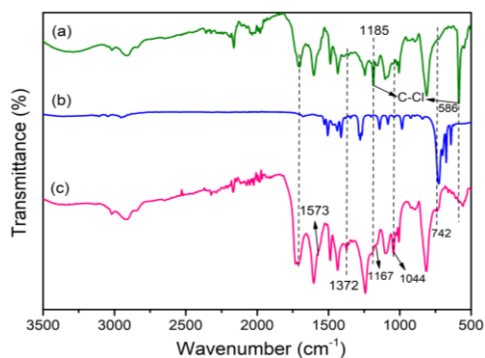

**Fig. S1.** (a) HCP-Cl(3), (b) 1,2-Dimethylimidazole, (c) HIP-Cl(3)-CH<sub>3</sub>.

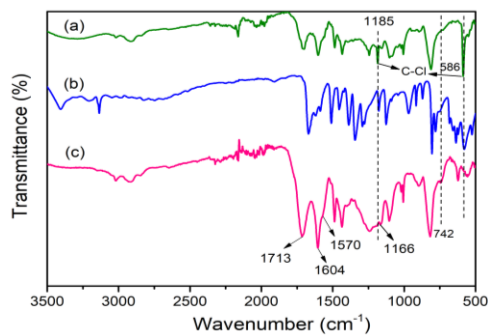

**Fig. S2.** (a) HCP-Cl(3), (b) 1-Methyl-1H-imidazole-2-carboxylic acid, (c) HIP-Cl(3)-COOH.

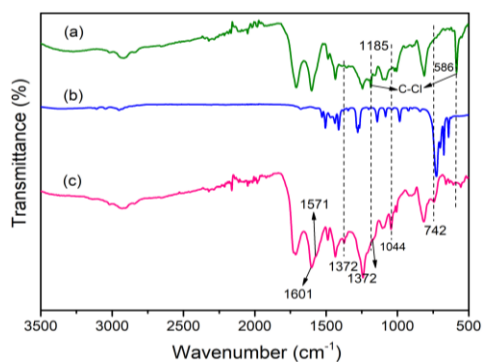

**Fig. S3.** (a) HCP-Cl(5), (b) 1,2-Dimethylimidazole (c) HIP-Cl(5)-CH<sub>3</sub>.

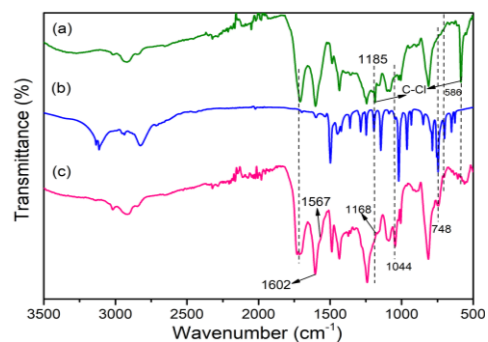

**Fig. S4.** (a) HCP-Cl(5), (b) 1H-Imidazole-2-methanol (c) HIP-Cl(5)-OH.

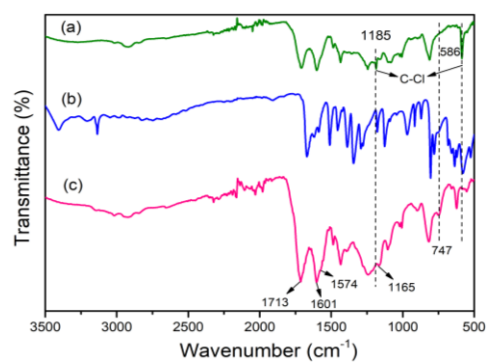

**Fig. S5.** (a) HCP(5)-Cl, (b) 1-Methyl-1H-imidazole-2-carboxylic acid, (c) HIP(5)-COOH.

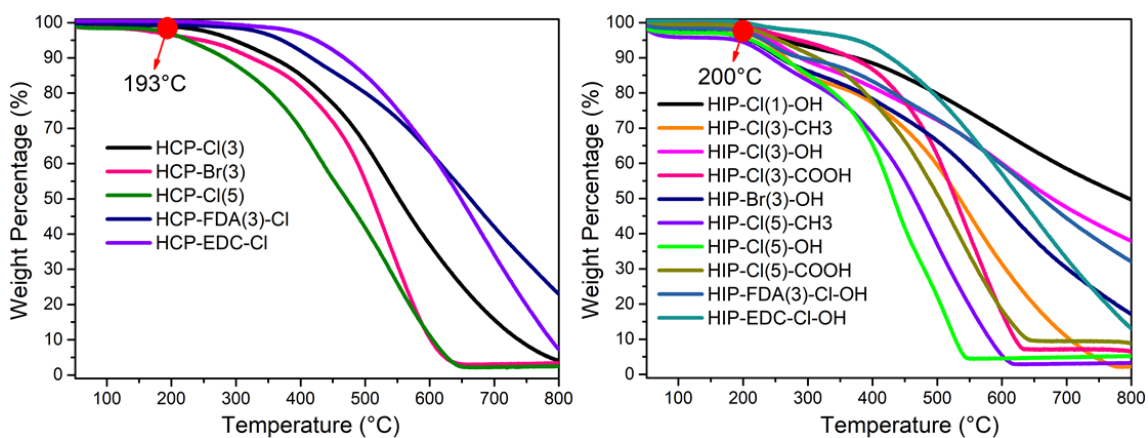

**Fig. S6.** TG curve of HCPs and HIPs.

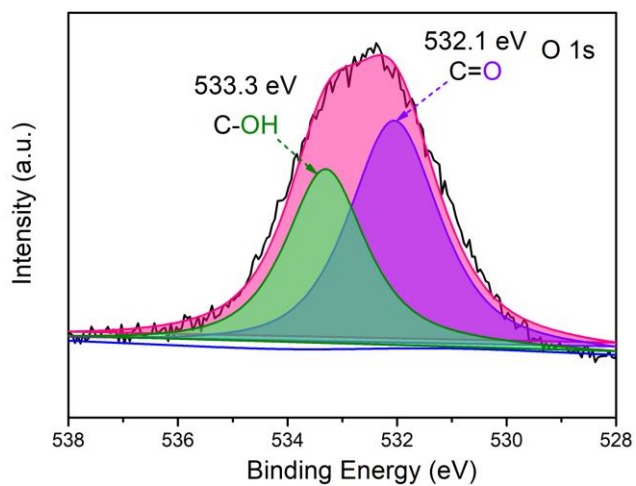

**Fig. S7.** O 1s XPS spectra of HIP-Cl(3)-OH.

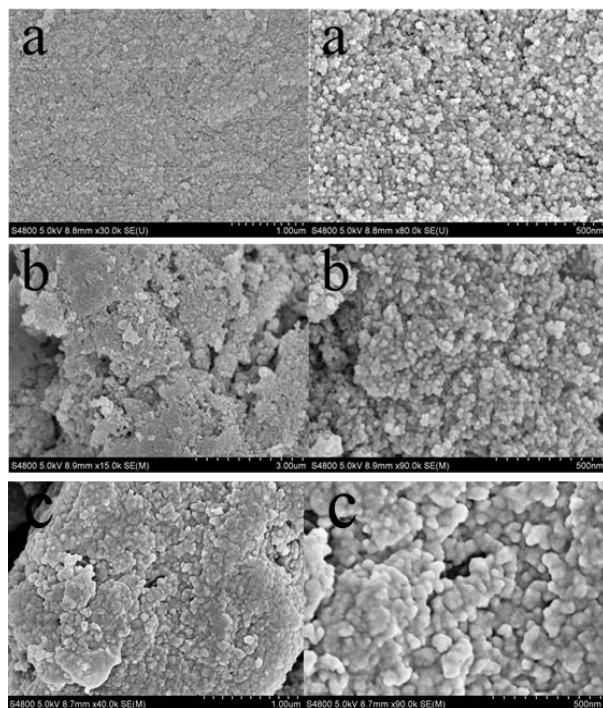

**Fig. S8.** SEM images of (a) HCP-Cl(3), (b) HIP-Cl(3)-OH, (c) HIP-Cl(3)-OH after run 6th.

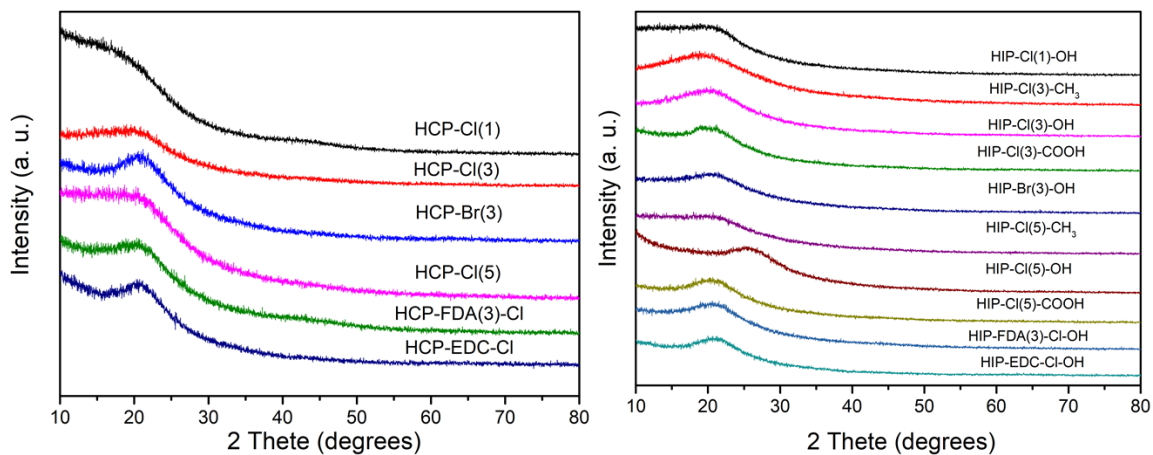

**Fig. S9.** XRD patterns of HCPs and HIPs.

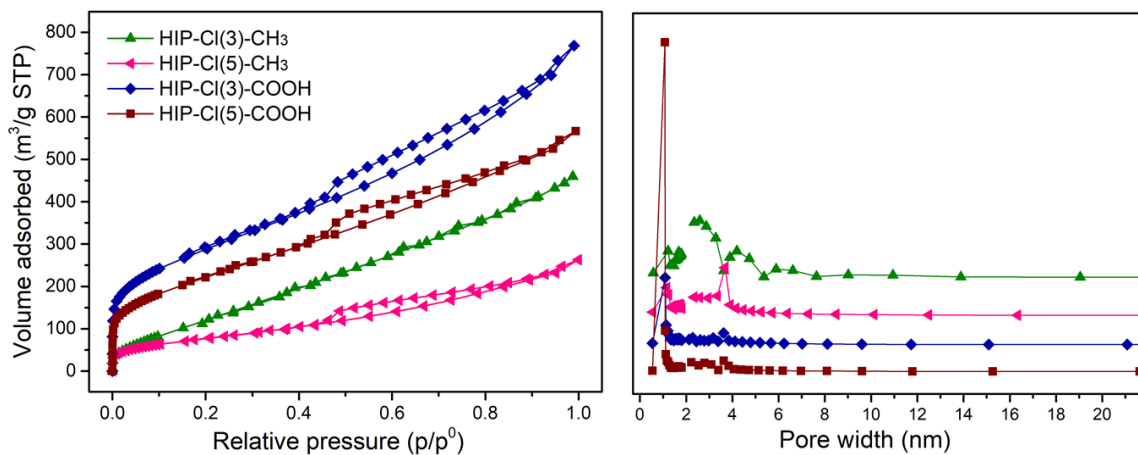

**Fig. S10.** (a)  $N_2$  sorption isotherm and (b) pore size distribution curve of HIP-CI(3)- $CH_3$ , HIP-CI(3)-COOH, HIP-CI(5)- $CH_3$ , HIP-CI(5)-COOH.

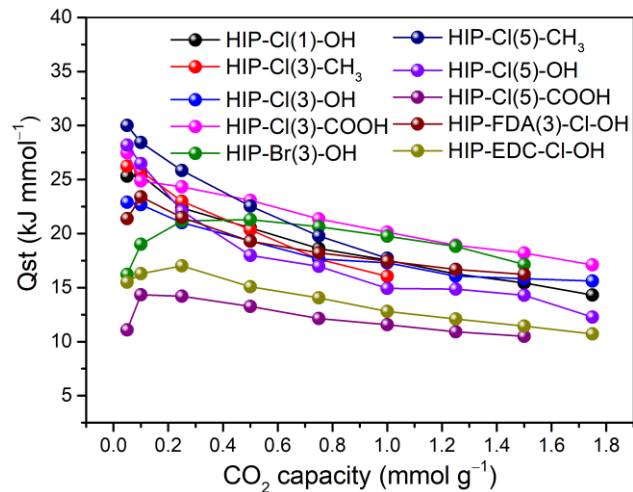

**Fig. S11.** The isosteric heats of adsorption, as calculated from the adsorption curves at two different temperatures 273K and 289K: HIP-Cl(1)-OH, HIP-Cl(3)-CH<sub>3</sub>, HIP-Cl(3)-COOH, HIP-Cl(3)-OH, HIP-Br(3)-OH, HIP-Cl(5)-CH<sub>3</sub>, HIP-Cl(5)-COOH, HIP-Cl(5)-OH, HIP-FDA(3)-Cl-OH, HIP-EDC-Cl-OH.

## <sup>1</sup>H NMR spectra of cyclic carbonates

Calculate the yield by using dibromomethane as a standard sample and significant peak is about 4.86 ppm, the peak of ethyl acetate is about 3.90, 1.84, 1.06 ppm.

**Fig. S12** <sup>1</sup>H NMR spectra (in CDCl<sub>3</sub>) of the reaction mixture using HIP-Cl(3)-OH as a catalyst for the cycloaddition reaction of Epichlorohydrin (<sup>1</sup>H NMR spectrum was obtained from the crude sample). <sup>1</sup>H NMR (500 MHz, CDCl<sub>3</sub>) δ: 4.90 (m, 1H), 4.45 (t, J=8.6 Hz, 1H), 4.23 (dd, J=3.0, 5.8 Hz, 1H), 3.71 (dd, J=4.1, 12.4 Hz, 1H), 3.61 (dd, J=3.7, 12.2 Hz, 1H).

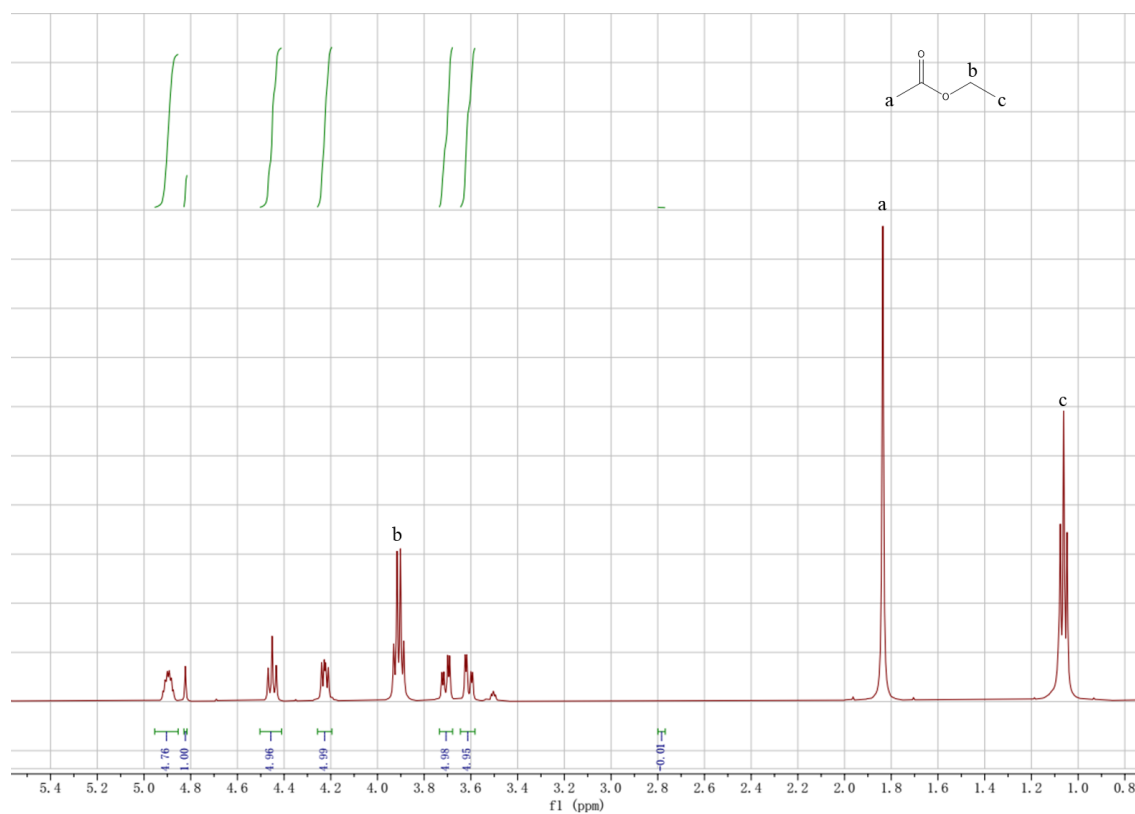



**Fig. S13**  $^1\text{H}$ NMR spectra (in  $\text{CDCl}_3$ ) of the reaction mixture using HIP-Cl(3)-OH as a catalyst for the cycloaddition reaction of Epibromohydrin ( $^1\text{H}$  NMR spectrum was obtained from the crude sample).  $^1\text{H}$  NMR (500 MHz,  $\text{CDCl}_3$ )  $\delta$ : 4.94 (m, 1H), 4.54 (t,  $J=8.6$  Hz, 1H), 4.28 (dd,  $J=3.0, 5.9$  Hz, 1H), 3.59 (dd,  $J=5.4, 11.2$  Hz, 1H), 3.61 (dd,  $J=3.9, 11.3$  Hz, 1H).

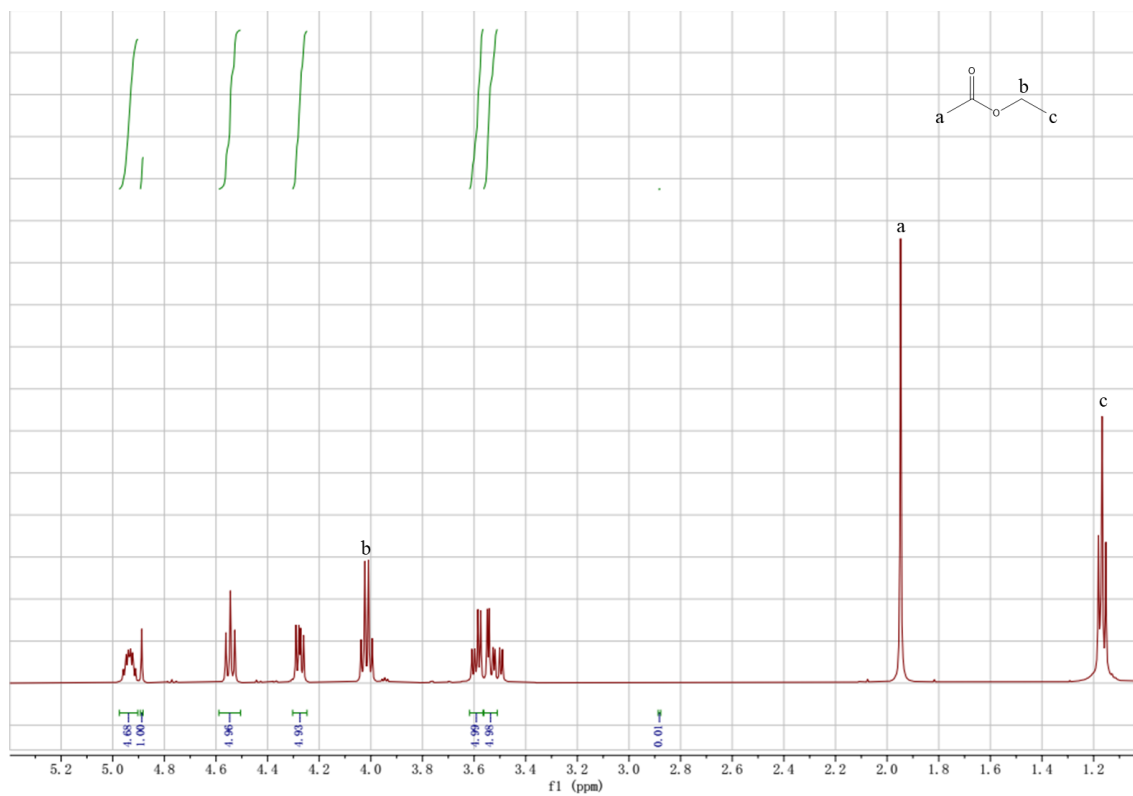

**Fig. S14**  $^1\text{H}$ NMR spectra (in  $\text{CDCl}_3$ ) of the reaction mixture using HIP-Cl(3)-OH as a catalyst for the cycloaddition reaction of Styrene oxide ( $^1\text{H}$  NMR spectrum was obtained from the crude sample).  $^1\text{H}$  NMR (500 MHz,  $\text{CDCl}_3$ )  $\delta$ : 7.41-7.34 (m, Ar-H, 5H), 5.65 (t,  $J=8.1$  Hz, 1H), 4.77 (t,  $J=8.5$  Hz, 1H), 4.29 (t,  $J=8.0$  Hz, 1H).

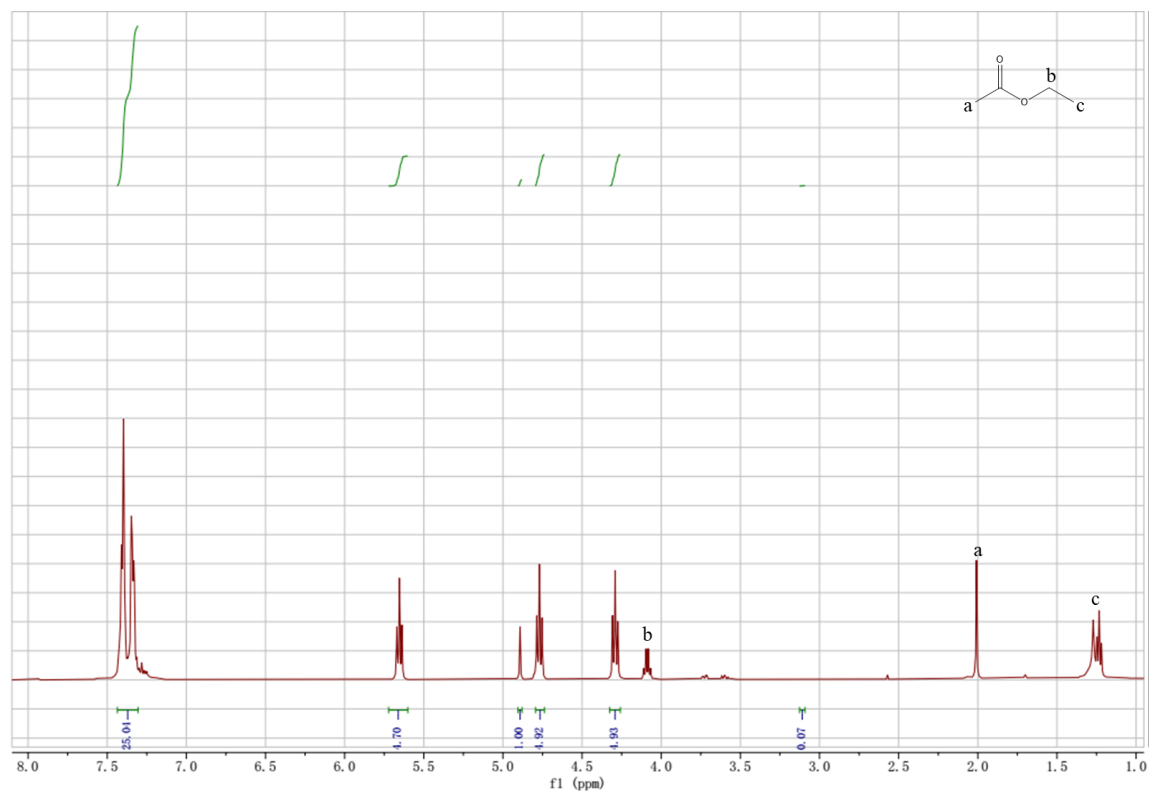

**Fig. S15**  $^1\text{H}$ NMR spectra (in  $\text{CDCl}_3$ ) of the reaction mixture using HIP-Cl(3)-OH as a catalyst for the cycloaddition reaction of Glycidyl phenyl ether ( $^1\text{H}$  NMR spectrum was obtained from the recrystallization).  $^1\text{H}$  NMR (500 MHz,  $\text{CDCl}_3$ )  $\delta$ : 7.33 (t,  $J=8.0$  Hz, 2H), 7.04 (t,  $J=7.1$  Hz, 1H), 6.94 (d,  $J=8.1$  Hz, 2H), 5.05 (m, 1H), 4.64 (t,  $J=8.5$  Hz, 1H), 4.56 (td,  $J=2.6, 5.9$  Hz, 1H), 4.26 (dd,  $J=4.2, 10.5$  Hz, 1H), 4.17 (dd,  $J=3.6, 10.6$  Hz, 1H).

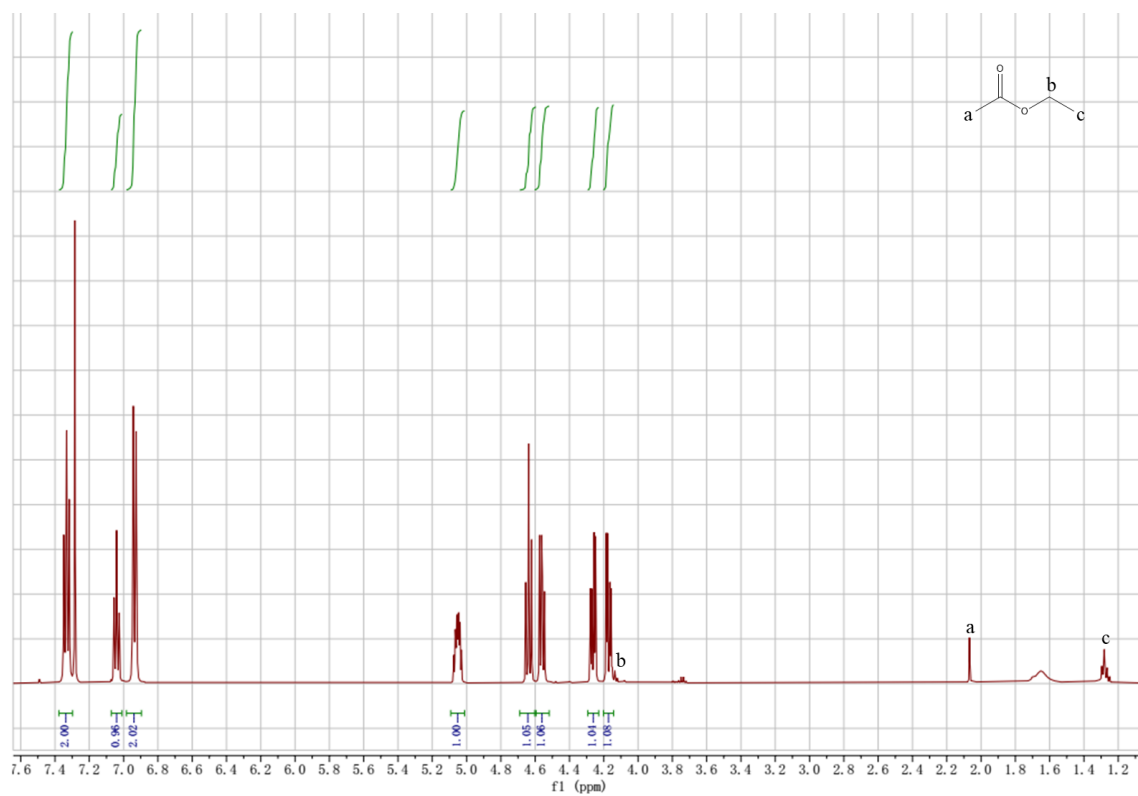

**Fig. S16**  $^1\text{H}$  NMR spectra (in  $\text{CDCl}_3$ ) of the reaction mixture using HIP-Cl(3)-OH as a catalyst for the cycloaddition reaction of O-Tolyl glycidyl ether ( $^1\text{H}$  NMR spectrum was obtained from the crude sample).  $^1\text{H}$  NMR (500 MHz,  $\text{CDCl}_3$ )  $\delta$ : 7.06 (t,  $J=7.4$  Hz, 2H), 6.82 (t,  $J=7.2$  Hz, 1H), 6.70 (d,  $J=8.4$  Hz, 1H), 4.95 (m, 1H), 4.50 (t,  $J=8.5$  Hz, 1H), 4.44 (td,  $J=3.1, 6.7$  Hz, 1H), 4.13 (dd,  $J=2.9, 10.8$  Hz, 1H), 3.99 (dd,  $J=3.2, 10.7$  Hz, 1H), 2.13 (s, 3H).

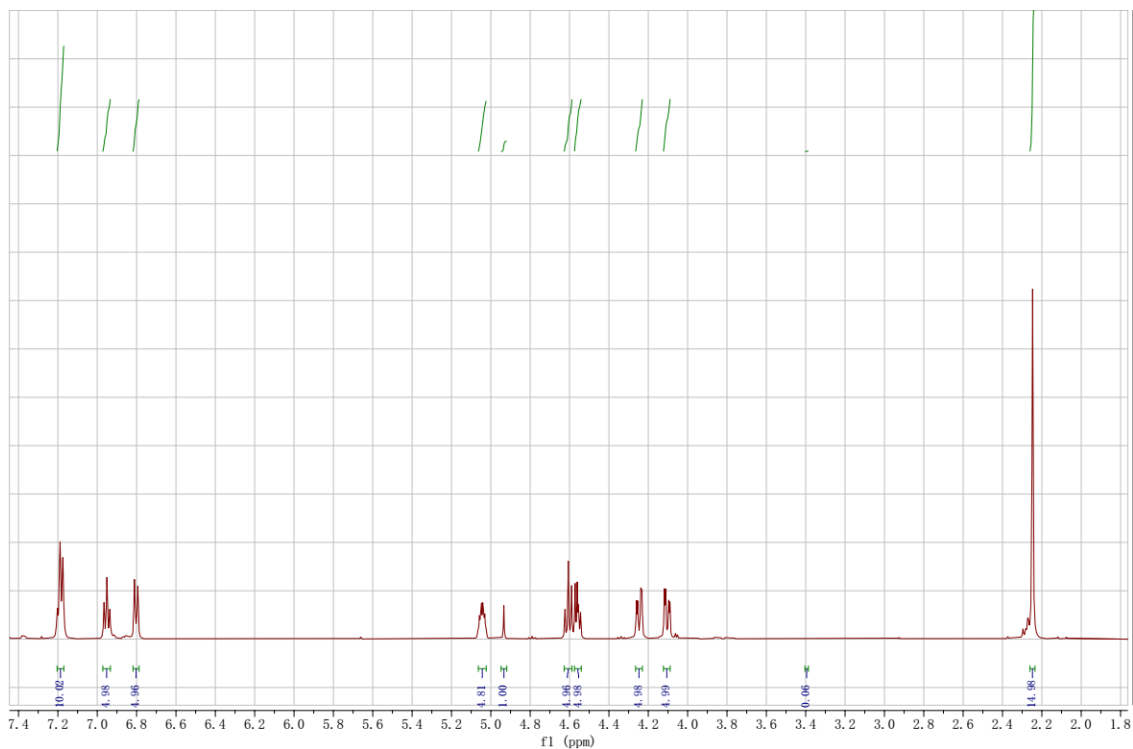

**Fig. S17**  $^1\text{H}$ NMR spectra (in  $\text{CDCl}_3$ ) of the reaction mixture using HIP-Cl(3)-OH as a catalyst for the cycloaddition reaction of Allyl glycidyl ether ( $^1\text{H}$  NMR spectrum was obtained from the crude sample).  $^1\text{H}$  NMR (500 MHz,  $\text{CDCl}_3$ )  $\delta$ : 5.74 (m, 1H), 5.15 (dd,  $J=1.2, 17.3$  Hz, 1H), 5.08 (d,  $J=10.4$  Hz, 1H), 4.74 (m, 1H), 4.40 (t,  $J=8.2$  Hz, 1H), 4.26 (dd,  $J=2.2, 6.1$  Hz, 1H), 3.92 (d,  $J=5.6$  Hz, 2 H), 3.46–3.36 (m, the product of allyl glycidyl ether obtained by free radical polymerization), 3.58 (dd,  $J=3.2, 11.2$  Hz, 1H), 3.50 (m, 3H).

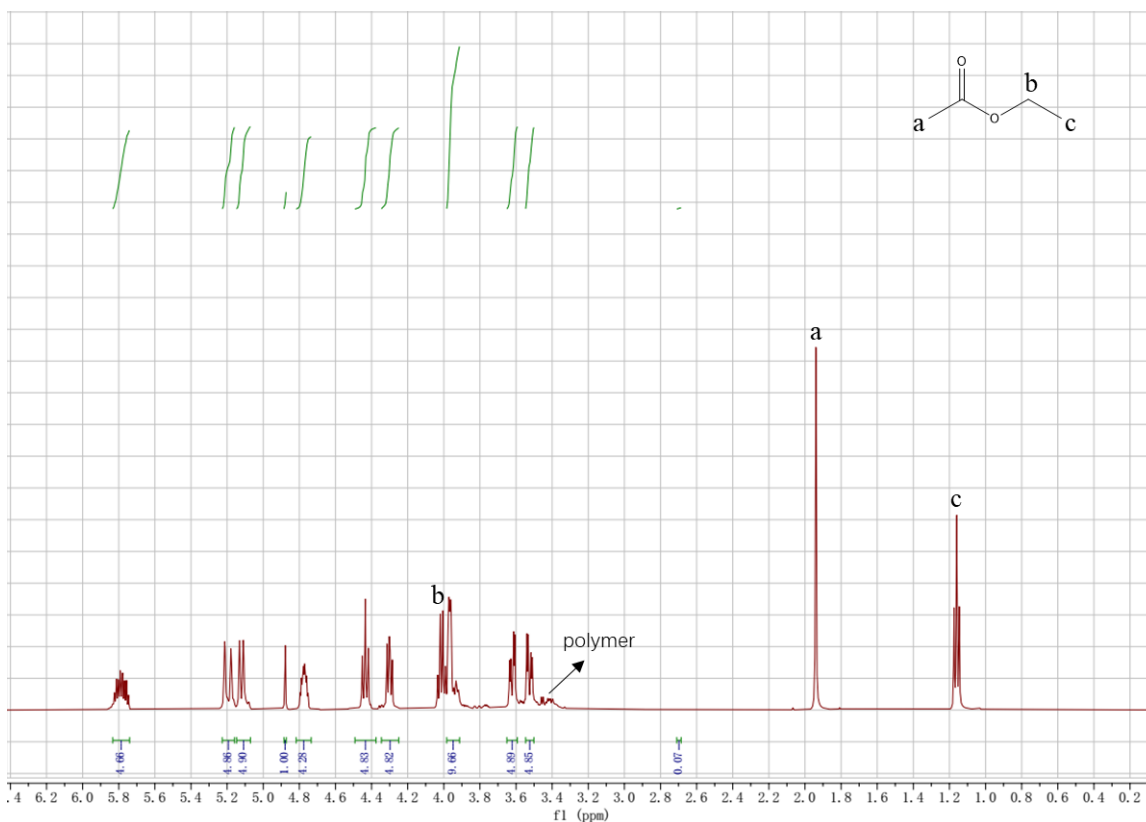

**Fig. S18**  $^1\text{H}$ NMR spectra (in  $\text{CDCl}_3$ ) of the reaction mixture using HIP-Cl(3)-OH as a catalyst for the cycloaddition reaction of Butyl glycidyl ether ( $^1\text{H}$  NMR spectrum was obtained from the crude sample).  $^1\text{H}$  NMR (500 MHz,  $\text{CDCl}_3$ )  $\delta$ : 4.73 (m, 1H), 4.39 (t,  $J=8.5$ , 1H), 4.25 (dd,  $J=2.2$ , 5.9 Hz, 1H), 3.57 (dd,  $J=3.5$ , 11.2 Hz, 1H), 3.47 (dd,  $J=3.6$ , 11.2 Hz, 1H), 3.39 (dd,  $J=1.1$ , 6.6 Hz, 2H), 1.44 (m, 2H), 1.25 (m, 2H), 0.79 (t,  $J=7.4$ , 3H).

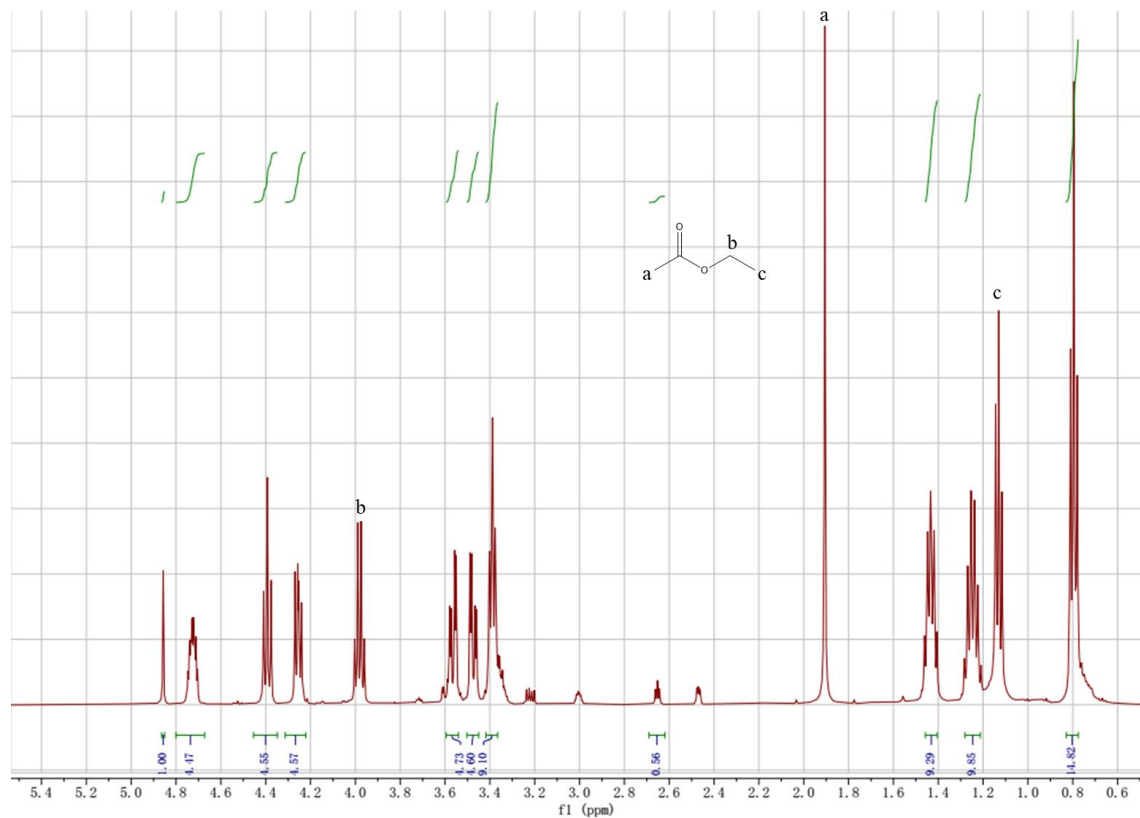

**Table S1** Textual properties of HIPs.

| Sample                    | $S_{\text{BET}}^{\text{a}}$<br>( $\text{m}^2 \text{g}^{-1}$ ) | $V_{\text{p}}^{\text{b}}$<br>( $\text{cm}^3 \text{g}^{-1}$ ) | $V_{\text{micro}}^{\text{c}}$<br>( $\text{cm}^3 \text{g}^{-1}$ ) | $D_{\text{total}}^{\text{d}}$<br>(nm) | $D_{\text{micro}}^{\text{e}}$<br>(nm) | $\text{CO}_2$<br>adsorption <sup>f</sup> (mmol<br>g <sup>-1</sup> )273K/298K | Qst (kJ<br>mol <sup>-1</sup> ) |
|---------------------------|---------------------------------------------------------------|--------------------------------------------------------------|------------------------------------------------------------------|---------------------------------------|---------------------------------------|------------------------------------------------------------------------------|--------------------------------|
| HIP-Cl(1)-OH              | 976                                                           | 0.894                                                        | 0.570                                                            | 3.665                                 | 1.076                                 | 2.73/1.82                                                                    | 25.23                          |
| HIP-Cl(3)-CH <sub>3</sub> | 374                                                           | 0.793                                                        | 0.101                                                            | 8.483                                 | 1.681                                 | 1.63/1.09                                                                    | 26.23                          |
| HIP-Cl(3)-COOH            | 979                                                           | 1.189                                                        | 0.487                                                            | 4.859                                 | 1.090                                 | 2.42/1.85                                                                    | 27.49                          |
| HIP-Cl(3)-OH              | 596                                                           | 0.559                                                        | 0.376                                                            | 3.752                                 | 1.082                                 | 3.22/2.02                                                                    | 22.89                          |
| HIP-Br(3)-OH              | 537                                                           | 0.670                                                        | 0.276                                                            | 4.985                                 | 1.095                                 | 2.11/1.49                                                                    | 16.23                          |
| HIP-Cl(5)-CH <sub>3</sub> | 255                                                           | 0.407                                                        | 0.100                                                            | 6.361                                 | 1.154                                 | 1.54/1.01                                                                    | 30.01                          |
| HIP-Cl(5)-COOH            | 744                                                           | 0.877                                                        | 0.410                                                            | 4.714                                 | 1.080                                 | 2.51/1.86                                                                    | 11.07                          |
| HIP-Cl(5)-OH              | 466                                                           | 0.476                                                        | 0.243                                                            | 4.089                                 | 1.145                                 | 2.20/1.61                                                                    | 28.19                          |
| HIP-FDA(3)-Cl-OH          | 765                                                           | 0.811                                                        | 0.471                                                            | 4.238                                 | 1.085                                 | 2.60/1.70                                                                    | 21.38                          |
| HIP-EDC-Cl-OH             | 1480                                                          | 1.903                                                        | 0.887                                                            | 5.144                                 | 1.080                                 | 2.82/2.26                                                                    | 15.50                          |

<sup>a</sup> BET surface area.<sup>b</sup> Total pore volume.<sup>c</sup> Microporous volume estimated by the DR method method.<sup>d</sup> Average pore size for total pores.<sup>e</sup> Most probable aperture of micropores volume.<sup>f</sup> CO<sub>2</sub> uptakes at 273 K and 298 K (1 bar).**Table S2** Elemental analysis of HIPs.

| Sample                       | C%    | H%    | S%    | N%   | IL Content<br>(mmol g <sup>-1</sup> ) |
|------------------------------|-------|-------|-------|------|---------------------------------------|
| HIP-Cl(1)-OH                 | 75.51 | 5.892 | 0.054 | 2.57 | 0.918                                 |
| HIP-Cl(3)-CH <sub>3</sub>    | 62.32 | 5.665 | 0.321 | 3.84 | 1.371                                 |
| HIP-Cl(3)-COOH               | 71.48 | 4.710 | 0.135 | 2.00 | 0.714                                 |
| HIP-Cl(3)-OH                 | 66.46 | 5.549 | 0.112 | 2.72 | 0.971                                 |
| HIP-Cl(3)-OH-Re <sup>a</sup> | 67.40 | 5.392 | 0.527 | 2.67 | 0.954                                 |
| HIP-Br(3)-OH                 | 64.58 | 4.926 | 0.036 | 2.62 | 0.935                                 |
| HIP-Cl(5)-CH <sub>3</sub>    | 62.76 | 5.699 | 0.528 | 3.44 | 1.229                                 |
| HIP-Cl(5)-COOH               | 62.45 | 4.573 | 0.086 | 1.23 | 0.439                                 |
| HIP-Cl(5)-OH                 | 64.84 | 5.234 | 0.062 | 2.65 | 0.946                                 |
| HIP-FDA(3)-Cl-OH             | 71.21 | 5.759 | 0.236 | 2.37 | 0.846                                 |
| HIP-EDC-Cl-OH                | 79.20 | 4.510 | 0.206 | 0.98 | 0.350                                 |

<sup>a</sup> Reused after six runs.

**Table S3** Activity of metal-free porous ionic polymers in the cycloaddition of CO<sub>2</sub> with styrene oxide.

| Catalyst                                                                       | t<br>(h) | Tem<br>(K) | CO <sub>2</sub> (MPa)                                | Co-catalyst       | Yield<br>(%) | Homogeneous/<br>Heterogeneous | Ref.         |
|--------------------------------------------------------------------------------|----------|------------|------------------------------------------------------|-------------------|--------------|-------------------------------|--------------|
| catalyst <b>4</b>                                                              | 24       | 373        | 0.1                                                  | None              | 80           | Homogeneous                   | 1            |
| SiO <sub>2</sub> -His                                                          | 10       | 403        | 0.5                                                  | None              | 99           | Heterogeneous                 | 2            |
| Al-PDC                                                                         | 20       | 373        | 0.1                                                  | None              | 98           | Hemogeneous                   | 3            |
| catalyst <b>1</b>                                                              | 24       | 373        | 0.1                                                  | None              | 99           | Heterogeneous                 | 4            |
| lignin                                                                         | 10       | 393        | 1                                                    | KI                | 96           | Heterogeneous                 | 5            |
| phenolated lignin<br>nanoparticles                                             | 24       | 333        | 0.1                                                  | TBAI              | 76±4         | Heterogeneous                 | 6            |
| LS-DIL-G3                                                                      | 5        | 263        | 1                                                    | TBAB              | 94           | Heterogeneous                 | 7            |
| IC2HCP-5b                                                                      | 32       | 393        | 3 MPa (15%<br>CO <sub>2</sub> +85 % N <sub>2</sub> ) | None              | 87           | Heterogeneous                 | 8            |
| HP-[BZPhIm]Cl-DCX-1                                                            | 24       | 393        | 0.1                                                  | None              | 91           | Heterogeneous                 | 9            |
| IHCP-OH(1)                                                                     | 2        | 408        | 3                                                    | None              | 94           | Heterogeneous                 | 10           |
| HPILs-Cl-2                                                                     | 9        | 343        | 0.1                                                  | TBAB              | 88           | Heterogeneous                 | 11           |
| HIP-Br-2                                                                       | 120      | 293        | 0.1                                                  | ZnBr <sub>2</sub> | 93           | Heterogeneous                 | 12           |
| Py-HCP-Br                                                                      | 8        | 393        | 2                                                    | None              | 89           | Heterogeneous                 | 13           |
| POM3-IM                                                                        | 12       | 393        | 1                                                    | None              | 89           | Heterogeneous                 | 14           |
| COP-114-(CH <sub>2</sub> NMe <sup>3+</sup> ) <sub>m</sub><br>axCl <sup>-</sup> | 24       | 373        | 0.1                                                  | None              | 96           | Heterogeneous                 | 15           |
| [HCP-CH <sub>2</sub> -Im][Cl]-1                                                | 5        | 413        | 0.1                                                  | None              | 99           | Heterogeneous                 | 16           |
| HIP-Cl(3)-OH                                                                   | 5        | 413        | 0.1                                                  | None              | 99           | Heterogeneous                 | This<br>work |
| HIP-Cl(3)-OH                                                                   | 8        | 393        | 0.1                                                  | None              | 98           | Heterogeneous                 | This<br>work |
| HIP-Cl(3)-OH                                                                   | 20       | 373        | 0.1                                                  | None              | 98           | Heterogeneous                 | This<br>work |



## Supplementary References

1. W. Natongchai, J. A. Luque-Urrutia, C. Phungpanya, M. Sola, V. DELia, A. Poater, H. Zipse, *Org. Chem. Front*, 2021, **8**, 613–627.
2. A. Z. Hajipour, Y. Heidari, G. Kozehgary, *Synlett*, 2016, **27**, 929–933
3. A. Mitra, T. Biswas, S. Ghosh, G. Tudu, K. S. Paliwal, S. Ghosh, V. Mahalingam, *Sustainable Energy Fuels*, 2022, **6**, 420–429.
4. S. Subramanian, J. Park, J. Byun, Y. Jung, C. T. Yavuz, *ACS Appl. Mater. Interfaces.*, 2018, **10**, 9478–9484.
5. L. Guo, R. Dou, Y. Wu, R. Zhang, L. Wang, Y. Wang, Z. Gong, J. Chen, X. Wu, *ACS Sustainable Chem. Eng.*, 2019, **7**, 16585–16594.
6. W. Jaroonwatana, T. Theerathanagorn, M. Theerasilp, S. D. Gobbo, D. Yiamsawas, V. Delia, D. Crespy, *Sustainable Energy Fuels*, 2021, **5**, 5431–5444.
7. S. Lai, J. Gao, H. Zhang, L. Chen, X. Xiong, *J. CO<sub>2</sub> Util.*, 2020, **38**, 148–157.
8. W. L. Zhang, F. P. Ma, L. Ma, Y. Zhou, J. Wang, *ChemSusChem*, 2020, **13**, 341–350.
9. H. Song, Y. Wang, Y. Liu, L. Chen, B. Feng, X. Jin, Y. Zhou, T. Huang, *ACS Sustainable Chem. Eng.*, 2021, **9**, 2115–2128.
10. D. G. Jia, L. Ma, Y. Wang, W. L. Zhang, J. Li, Y. Zhou, J. Wang, *Chem. Eng. J.*, 2020, **390**, 124652.
11. Y. F. Sang, J. H. Huang, *Chem. Eng. J.*, 2020, **385**, 123973.
12. J. Li, D. G. Jia, Z. J. Guo, Y. Q. Liu, Y. N. Lyu, Y. Zhou, J. Wang, *Green Chem.*, 2017, **19**, 2675–2686.
13. C. Liu, L. Shi, J. Zhang, J. Sun, *Chem. Eng. J.*, 2022, **427**, 131633.
14. J. Wang, W. Sng, G. Yi, Y. Zhang, *Chem. Commun.*, 2015, **51**, 12076–12079
15. D. Kim, S. Subramanian, D. Thirion, Y. D. Song, A. Jamal, M. S. Otaibi, C. T. Yavuz, *Catal. Today.*, 2020, **356**, 527–534.

16. X. Liao, B. Pei, R. Ma, L. Kong, X. Gao, J. He, X. Luo, J. Lin, *Catalysts*, 2022, **12**, 62.
